# Supplementary material for: Case Study 4: A 68-Year-Old Woman With Progressive Cognitive Decline and Anxiety
Source: Atypon-hosted journal article supplement (doi:10.1176/appi.neuropsych.20220151), 2023-01-01
Supplement: appi.neuropsych.20220151.ds001.pdf [file appi.neuropsych.20220151.ds001.pdf]

Table S1. Factors predicting progression from MCI to Alzheimer’s disease dementia {38}

(bolded ones were present in our patient)

| <b>Risk Factors</b>                                                           | <b>Relative Risk</b> | <b>Confidence Interval</b> |
|-------------------------------------------------------------------------------|----------------------|----------------------------|
| Presence of at least one ApoE4 allele                                         | 1.93                 | 1.65-2.26                  |
| Elevated CSF phosphorylated tau                                               | 2.43                 | 1.70-3.48                  |
| Elevated CSF total tau                                                        | 1.86                 | 1.35-2.55                  |
| Abnormal CSF phosphorylated tau/A $\beta$ <sub>42</sub> ratio                 | 3.00                 | 2.12-4.23                  |
| <b>Hippocampal atrophy</b>                                                    | <b>2.59</b>          | <b>1.95-3.44</b>           |
| <b>Mesial Temporal Lobe atrophy</b>                                           | <b>2.11</b>          | <b>1.70-2.63</b>           |
| <b>Entorhinal atrophy</b>                                                     | <b>2.03</b>          | <b>1.57-2.62</b>           |
| <b>White matter hyperintensity volume</b>                                     | <b>1.03</b>          | <b>1.00-1.07</b>           |
| Depression                                                                    | 1.35                 | 1.05-1.75                  |
| Diabetes mellitus                                                             | 1.70                 | 1.13-2.56                  |
| Older age                                                                     | 1.06                 | 1.03-1.10                  |
| <b>Female sex</b>                                                             | <b>1.33</b>          | <b>1.08-1.64</b>           |
| Lower Mini Mental Status Exam (MMSE) score                                    | 1.75                 | 1.04-2.96                  |
| Higher Alzheimer Disease Assessment Scale Cognitive subscale (ADAS-Cog) score | 1.12                 | 1.06-1.19                  |
